# Supplementary material for: ZNF384–ZEB1 feedback loop regulates breast cancer metastasis
Source: PubMed Central journal article supplement (PMC9469556; doi:10.1186/s10020-022-00541-1), 2022-09-13
Supplement: 10020_2022_541_MOESM1_ESM.pdf [file 10020_2022_541_MOESM1_ESM.pdf]

**Table S1. Oligonucleotides of miRNAs and siRNAs**

|                      |                                                                |
|----------------------|----------------------------------------------------------------|
| mimic control        | UGUACCAAUUUCCAGUGGAGAU                                         |
| inhibitor control    | AUGGUGUUAUCAAGUGUAACAG                                         |
| miR-485-5p mimics    | UAUGCAUUGUAUUUUUAGGUCC                                         |
| miR-485-5p inhibitor | AUACGUAACAUA AAAAUCCAGG                                        |
| shZNF384 sense       | ccggCGGCAACACAACAAAGATAAACTCGAGTTTATCTTTGTTGTGTTGCC<br>GTTTTTg |
| shZNF384 anti-sense  | aattcAAAAACGGCAACACAACAAAGATAAACTCGAGTTTATCTTTGTTGTG<br>TTGCCG |
| siZEB1               | GCUGUUGUUCUGCCAACAGTT                                          |

**Table S2. Oligonucleotides used for RT-qPCR**

| Name       | Sequence (5' to 3')        |
|------------|----------------------------|
| miR-485-5p | CCAAGCTTCACCCATTCTAACAGGAC |
| U6         | CTCGCTTCGGCAGCACA          |
| ZNF384 up  | GTCTCAGGTCAGATCGAGAACA     |
| ZNF384 low | ACTCTGTGTCCATACTGATGCC     |
| TWIST1 up  | GCAAGAAGTCGAGCGAAGAT       |
| TWIST1 low | GCTCTGCAGCTCCTCGAA         |
| SNAIL up   | GTCCGTCTGCCGCACCTGAG       |
| SNAIL low  | ACACGGCGGTCCCTACAGC        |
| SLUG up    | TTCGGACCCACACATTACCT       |
| SLUG low   | TTGGAGCAGTTTTTGC ACTG      |
| ZEB1 up    | TCAAAAGGAAGTCAATGGACAA     |
| ZEB1 low   | GTGCAGGAGGGACCTCTTTA       |
| GAPDH up   | CAAGGTCATCCATGACA ACTTTG   |
| GAPDH low  | GTCCACCACCCTGTTGCTGTAG     |

**Table S3. Antibodies used for study**

| Name           | Source    | Catalog  |
|----------------|-----------|----------|
| ZNF384         | Abcam     | ab176689 |
| $\beta$ -Actin | Immunoway | YM3028   |

|            |           |          |
|------------|-----------|----------|
| E-cadherin | Immunoway | YT1454   |
| Vimentin   | Immunoway | YT4879   |
| N-cadherin | Immunoway | YT2988   |
| ZEB1       | Abcam     | ab180905 |

**Table S4. Oligonucleotides used for ChIP and methylation specific PCR**

| Name              | Sequence (5' to 3') |
|-------------------|---------------------|
| ZNF384 site 1 up  | CGAGTGGGGTCCACGTTT  |
| ZNF384 site 1 low | CATTATCCGGCTTCAGCG  |
| ZNF384 site 2 up  | CGCTGAAGCCGGATAATG  |
| ZNF384 site 2 low | TTCAGGTCTCGATCCCTC  |
| ZNF384 site 3 up  | GAGAGACGTTGTAAGTTG  |
| ZNF384 site 3 low | GTTGCCGCCATTATTAT   |
| ZNF384 site 4 up  | GCCGCAGCCCAGGCTATA  |
| ZNF384 site 4 low | CGCGTTTCGCATCCCAGA  |
| ZEB1 site up      | GGCAGCTTCAGGAAAGAT  |
| ZEB1 site low     | TCTTCTGGAAGTCGGCCT  |
